# Supplementary material
Source: publisher figshare collection journal article supplement (https://tandf.figshare.com/articles/dataset/_/11871192)
Supplement: Supplementary file 1 [file 2]

Archive with 3 entries (3 files):
- ianb_a_1727491_sm1826.xlsx
- ianb_a_1727491_sm1825.doc
- ianb_a_1727491_sm1824.pdf
