# Supplementary material
Source: publisher figshare collection journal article supplement (https://tandf.figshare.com/articles/dataset/_/11871192)

Sullementary figure 1

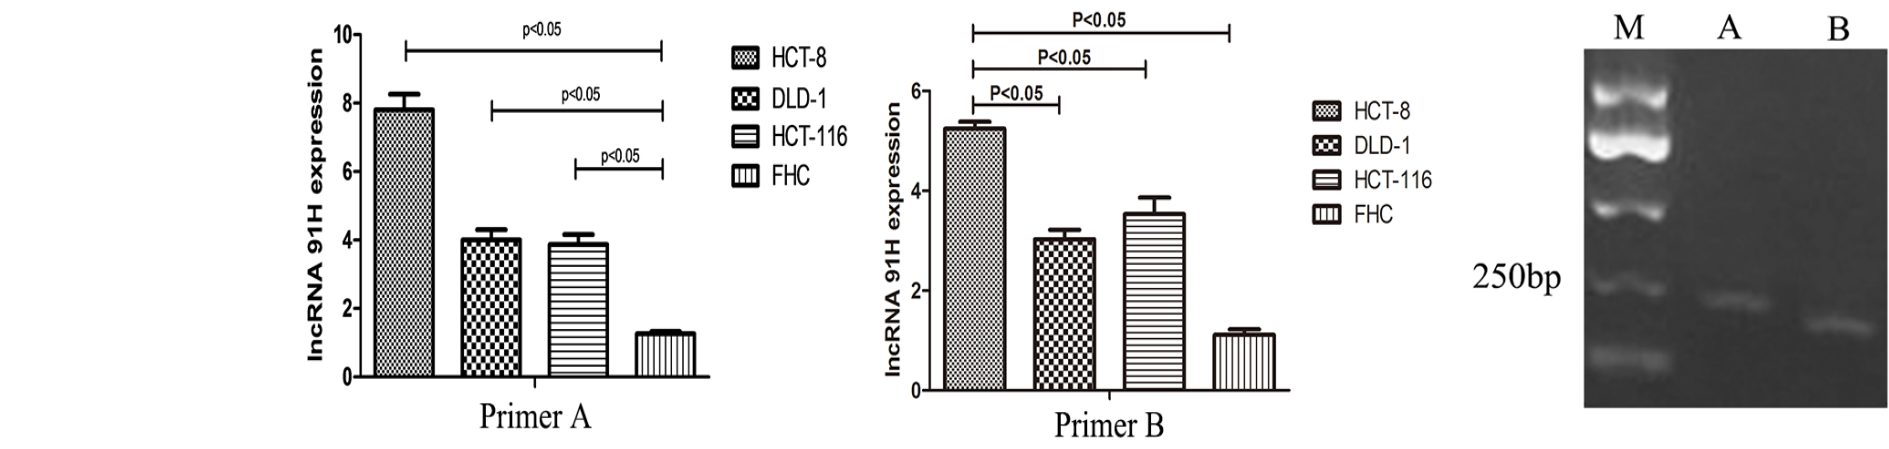

Sullementary figure 2

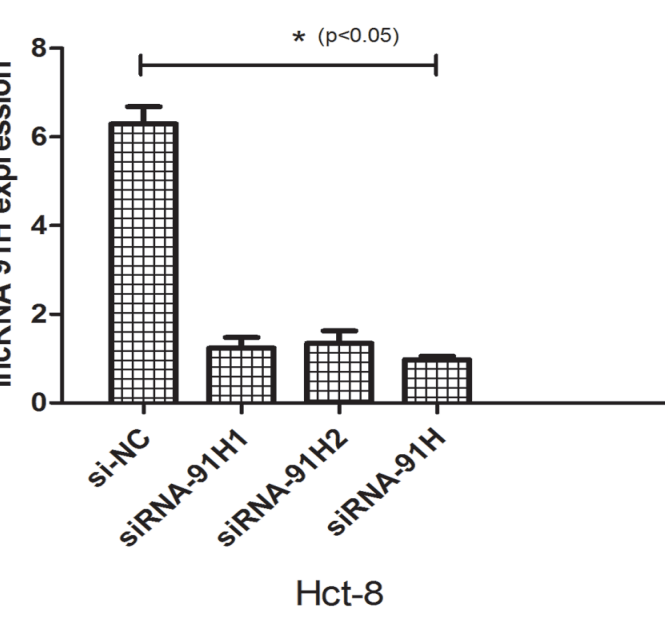

Sullementary figure 3

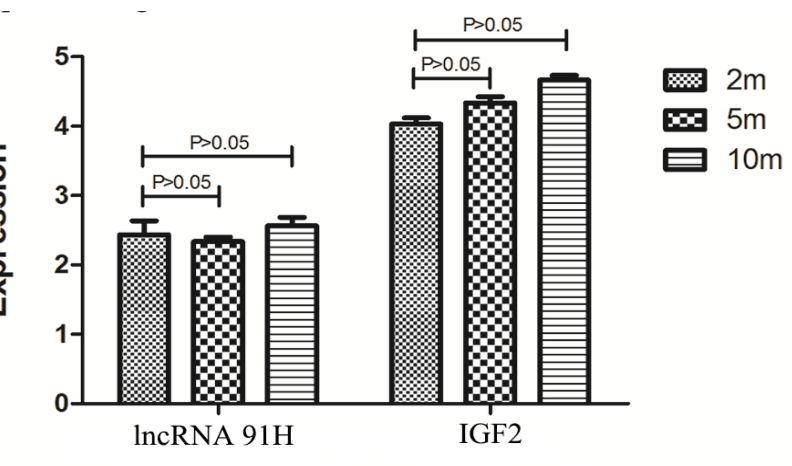

Sullementary figure 4

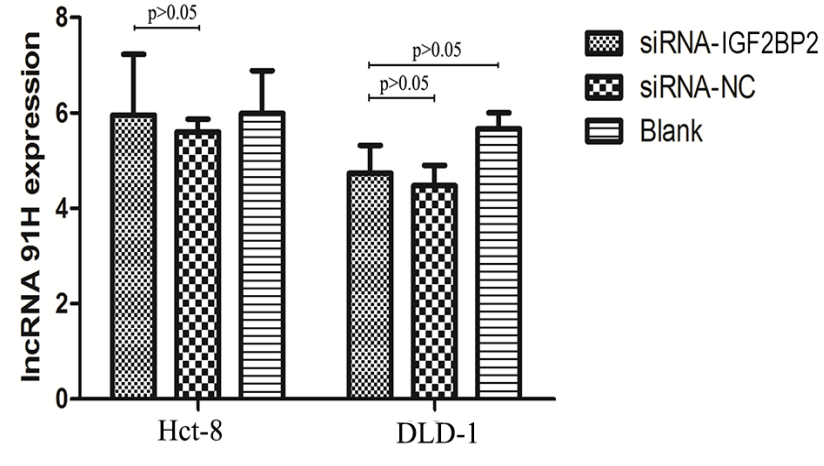

Sullementary figure 5

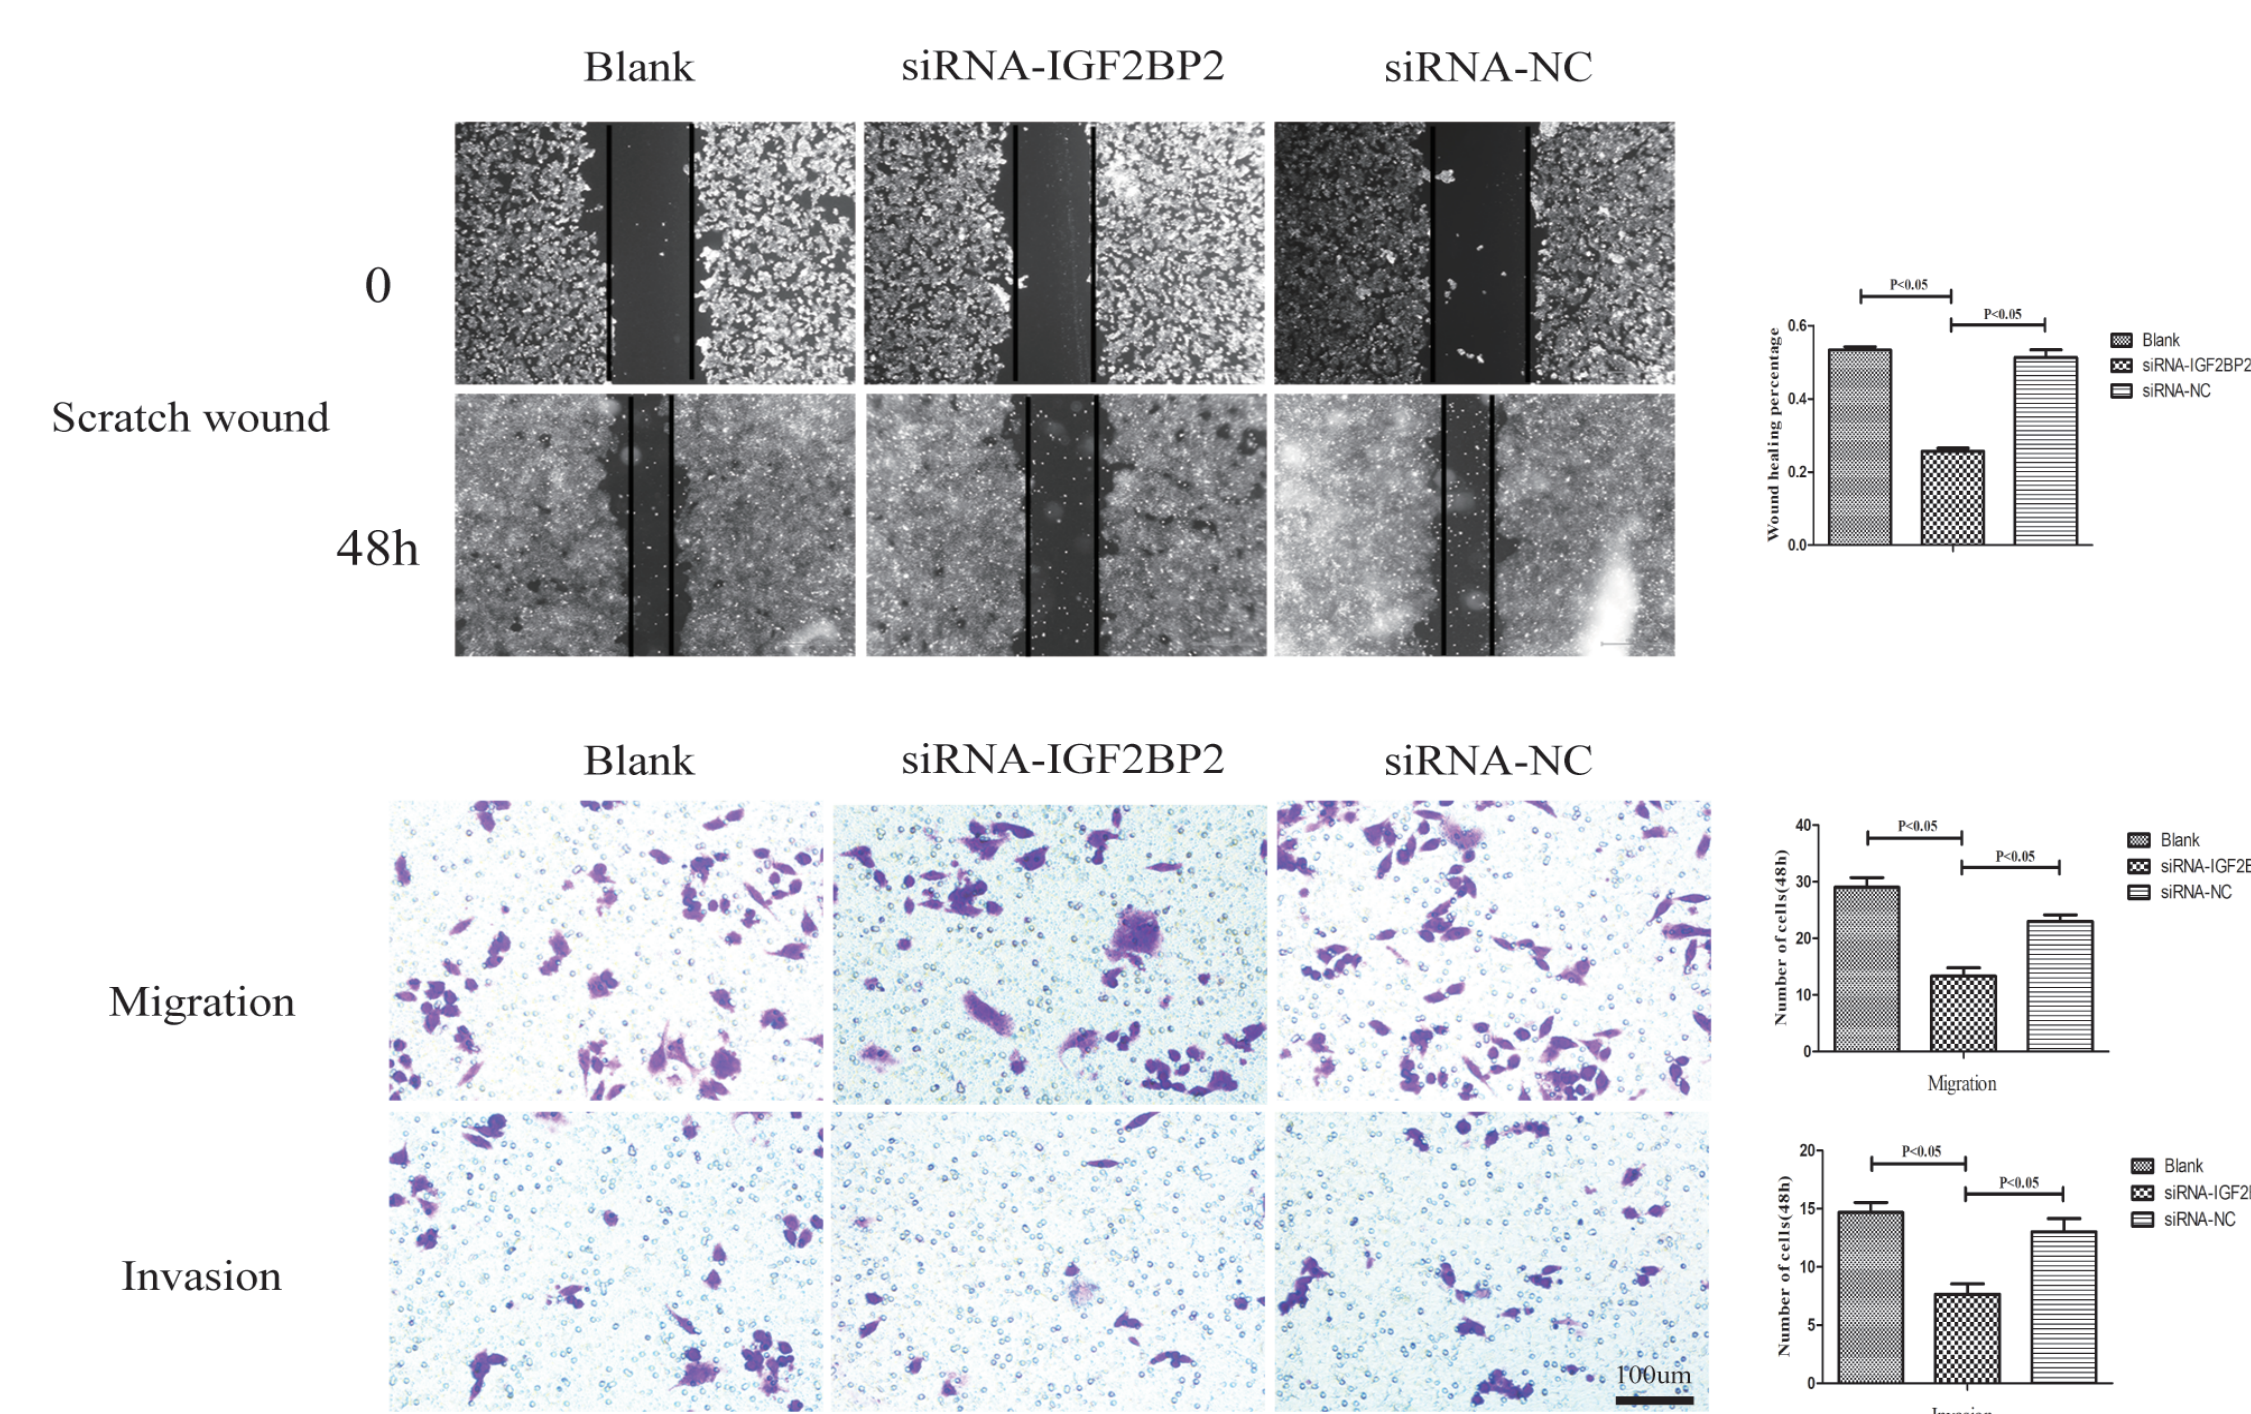

Sullementary figure 6

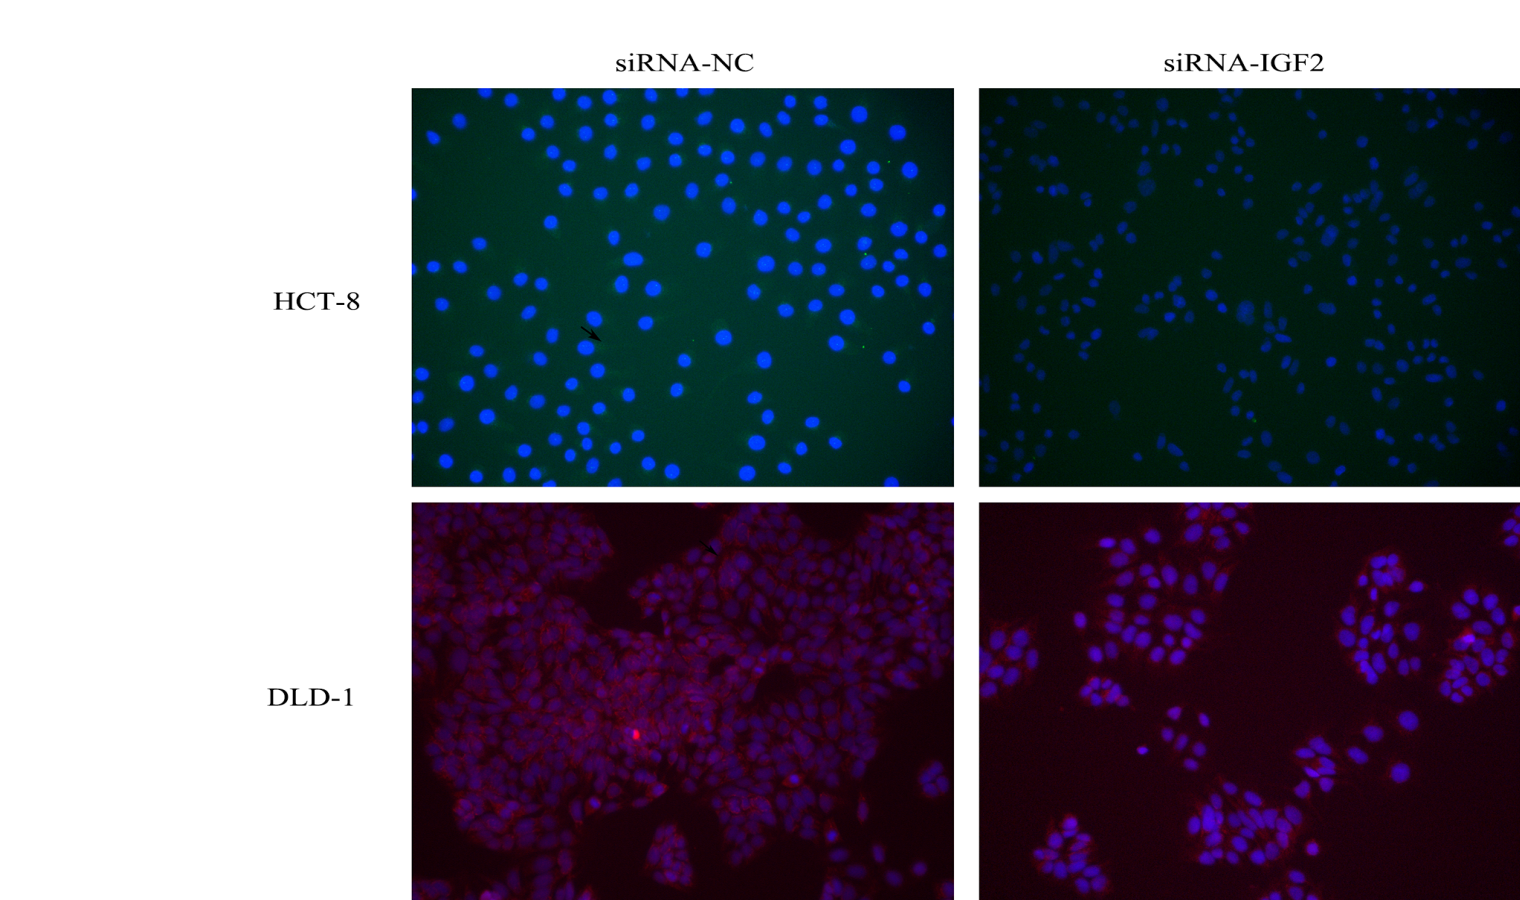

Supplement: Supplementary file 1 [file 2 › ianb_a_1727491_sm1824.pdf]
