# Supplementary material
Source: publisher figshare collection journal article supplement (https://tandf.figshare.com/articles/dataset/_/11871192)
Supplement: Supplementary file 1 [file 2 › ianb_a_1727491_sm1826.xlsx]

## Sheet: Sheet1
		Score	Mass	Matches	emPAI
1	tr|U3KQK0|U3KQK0_HUMAN	170	18792	8 (6)	0.64	Histone H2B OS=Homo sapiens GN=HIST1H2BN PE=1 SV=1
2	sp|Q15233|NONO_HUMAN	92	54311	17 (8)	0.6	Non-POU domain-containing octamer-binding protein OS=Homo sapiens GN=NONO PE=1 SV=4
3	sp|Q86YZ3|HORN_HUMAN	83	283140	2 (2)	0.02	Hornerin OS=Homo sapiens GN=HRNR PE=1 SV=2
4	tr|B4E363|B4E363_HUMAN	71	54181	2 (2)	0.13	Phenylalanine--tRNA ligase alpha subunit OS=Homo sapiens GN=FARSA PE=1 SV=1
5	sp|O43175|SERA_HUMAN	65	57356	6 (3)	0.18	D-3-phosphoglycerate dehydrogenase OS=Homo sapiens GN=PHGDH PE=1 SV=4
6	tr|H3BTN5|H3BTN5_HUMAN	61	53524	12 (3)	0.2	Pyruvate kinase (Fragment) OS=Homo sapiens GN=PKM PE=1 SV=1
7	tr|G5EA52|G5EA52_HUMAN	60	55328	12 (1)	0.06	Protein disulfide-isomerase OS=Homo sapiens GN=PDIA3 PE=1 SV=1
8	tr|F5H8J2|F5H8J2_HUMAN	59	51493	15 (3)	0.2	Uncharacterized protein OS=Homo sapiens GN=P4HB PE=1 SV=1
9	sp|P06733|ENOA_HUMAN	59	47481	4 (1)	0.07	Alpha-enolase OS=Homo sapiens GN=ENO1 PE=1 SV=2
10	sp|Q9UKX7|NUP50_HUMAN	58	50512	3 (1)	0.07	Nuclear pore complex protein Nup50 OS=Homo sapiens GN=NUP50 PE=1 SV=2
11	sp|P50991|TCPD_HUMAN	56	58401	7 (5)	0.25	T-complex protein 1 subunit delta OS=Homo sapiens GN=CCT4 PE=1 SV=4
12	sp|P31948|STIP1_HUMAN	55	63227	9 (2)	0.11	Stress-induced-phosphoprotein 1 OS=Homo sapiens GN=STIP1 PE=1 SV=1
13	tr|H0Y449|H0Y449_HUMAN	54	42333	2 (1)	0.08	Nuclease-sensitive element-binding protein 1 (Fragment) OS=Homo sapiens GN=YBX1 PE=1 SV=1
14	sp|P60709|ACTB_HUMAN	54	42052	4 (1)	0.08	Actin, cytoplasmic 1 OS=Homo sapiens GN=ACTB PE=1 SV=1
15	sp|P10809|CH60_HUMAN	53	61187	2 (1)	0.05	60 kDa heat shock protein, mitochondrial OS=Homo sapiens GN=HSPD1 PE=1 SV=2
16	sp|P54577|SYYC_HUMAN	52	59448	7 (2)	0.11	Tyrosine--tRNA ligase, cytoplasmic OS=Homo sapiens GN=YARS PE=1 SV=4
17	tr|F8W930|F8W930_HUMAN	49	66859	5 (1)	0.05	Insulin-like growth factor 2 mRNA-binding protein 2 OS=Homo sapiens GN=IGF2BP2 PE=1 SV=1
18	sp|Q5VTE0|EF1A3_HUMAN	48	50495	5 (2)	0.13	Putative elongation factor 1-alpha-like 3 OS=Homo sapiens GN=EEF1A1P5 PE=5 SV=1
19	sp|Q9Y3I0|RTCB_HUMAN	48	55688	3 (2)	0.12	tRNA-splicing ligase RtcB homolog OS=Homo sapiens GN=RTCB PE=1 SV=1
20	tr|K7ENJ4|K7ENJ4_HUMAN	47	21383	3 (2)	0.34	ATP synthase subunit alpha, mitochondrial (Fragment) OS=Homo sapiens GN=ATP5A1 PE=1 SV=1
21	tr|K7EQ48|K7EQ48_HUMAN	47	53596	11 (2)	0.13	Glucose-6-phosphate isomerase OS=Homo sapiens GN=GPI PE=1 SV=2
22	sp|P23246|SFPQ_HUMAN	46	76216	5 (1)	0.04	Splicing factor, proline- and glutamine-rich OS=Homo sapiens GN=SFPQ PE=1 SV=2
23	tr|Q5T6W5|Q5T6W5_HUMAN	43	47756	6 (1)	0.07	Heterogeneous nuclear ribonucleoprotein K OS=Homo sapiens GN=HNRNPK PE=1 SV=1
24	sp|Q9UN86|G3BP2_HUMAN	42	54145	9 (2)	0.13	Ras GTPase-activating protein-binding protein 2 OS=Homo sapiens GN=G3BP2 PE=1 SV=2
25	tr|A2IDB1|A2IDB1_HUMAN	42	7737	1 (1)	0.45	14-3-3 protein eta OS=Homo sapiens GN=YWHAH PE=1 SV=1
26	sp|P05455|LA_HUMAN	41	46979	1 (1)	0.07	Lupus La protein OS=Homo sapiens GN=SSB PE=1 SV=2
27	sp|P16989|YBOX3_HUMAN	40	40066	4 (1)	0.08	Y-box-binding protein 3 OS=Homo sapiens GN=YBX3 PE=1 SV=4
28	tr|F6UXX1|F6UXX1_HUMAN	39	20301	2 (1)	0.17	Heterogeneous nuclear ribonucleoprotein Q (Fragment) OS=Homo sapiens GN=SYNCRIP PE=1 SV=1
29	sp|P09382|LEG1_HUMAN	37	15048	1 (1)	0.23	Galectin-1 OS=Homo sapiens GN=LGALS1 PE=1 SV=2
30	tr|Q5JW30|Q5JW30_HUMAN	36	54903	4 (2)	0.12	Double-stranded RNA-binding protein Staufen homolog 1 OS=Homo sapiens GN=STAU1 PE=1 SV=1
31	tr|A6NHG8|A6NHG8_HUMAN	36	63145	6 (2)	0.11	TNF receptor-associated factor 3 OS=Homo sapiens GN=TRAF3 PE=4 SV=1
32	sp|P04406|G3P_HUMAN	36	36201	5 (2)	0.19	Glyceraldehyde-3-phosphate dehydrogenase OS=Homo sapiens GN=GAPDH PE=1 SV=3
33	tr|B0YJC4|B0YJC4_HUMAN	34	49680	7 (2)	0.14	Vimentin OS=Homo sapiens GN=VIM PE=1 SV=1
34	tr|H0Y4R1|H0Y4R1_HUMAN	34	51549	2 (1)	0.06	Inosine-5'-monophosphate dehydrogenase 2 (Fragment) OS=Homo sapiens GN=IMPDH2 PE=1 SV=1
35	sp|P08243|ASNS_HUMAN	32	64899	7 (1)	0.05	Asparagine synthetase [glutamine-hydrolyzing] OS=Homo sapiens GN=ASNS PE=1 SV=4
36	tr|H0YHM6|H0YHM6_HUMAN	31	26231	1 (1)	0.13	Alpha-aminoadipic semialdehyde dehydrogenase (Fragment) OS=Homo sapiens GN=ALDH7A1 PE=1 SV=2
37	tr|I3L3D5|I3L3D5_HUMAN	30	17620	1 (1)	0.19	Profilin-1 (Fragment) OS=Homo sapiens GN=PFN1 PE=1 SV=1
38	tr|Q5JP53|Q5JP53_HUMAN	30	48135	2 (1)	0.07	Tubulin beta chain OS=Homo sapiens GN=TUBB PE=1 SV=1
39	tr|B4DTG6|B4DTG6_HUMAN	30	46611	9 (1)	0.07	Protein LSM14 homolog A OS=Homo sapiens GN=LSM14A PE=1 SV=1
40	tr|Q5JP01|Q5JP01_HUMAN	28	31883	2 (1)	0.1	Histone-binding protein RBBP7 (Fragment) OS=Homo sapiens GN=RBBP7 PE=1 SV=1
41	tr|E9PHJ5|E9PHJ5_HUMAN	28	44263	1 (1)	0.07	Forkhead box protein P2 OS=Homo sapiens GN=FOXP2 PE=4 SV=1
42	sp|P54886|P5CS_HUMAN	28	87989	1 (1)	0.04	Delta-1-pyrroline-5-carboxylate synthase OS=Homo sapiens GN=ALDH18A1 PE=1 SV=2
43	sp|Q02790|FKBP4_HUMAN	28	52057	3 (1)	0.06	Peptidyl-prolyl cis-trans isomerase FKBP4 OS=Homo sapiens GN=FKBP4 PE=1 SV=3
44	sp|P22612|KAPCG_HUMAN	27	40580	2 (1)	0.08	cAMP-dependent protein kinase catalytic subunit gamma OS=Homo sapiens GN=PRKACG PE=1 SV=3
45	tr|E9PFT6|E9PFT6_HUMAN	25	15581	2 (1)	0.22	Hemoglobin subunit delta OS=Homo sapiens GN=HBD PE=1 SV=1
46	sp|P09874|PARP1_HUMAN	25	113811	1 (1)	0.03	Poly [ADP-ribose] polymerase 1 OS=Homo sapiens GN=PARP1 PE=1 SV=4
47	tr|E7ENK3|E7ENK3_HUMAN	25	108550	1 (1)	0.03	Glutamate receptor ionotropic, kainate 1 OS=Homo sapiens GN=GRIK1 PE=4 SV=1
48	sp|Q9BQE3|TBA1C_HUMAN	24	50548	3 (1)	0.07	Tubulin alpha-1C chain OS=Homo sapiens GN=TUBA1C PE=1 SV=1
49	tr|B4DR63|B4DR63_HUMAN	24	41255	1 (1)	0.08	26S protease regulatory subunit 4 OS=Homo sapiens GN=PSMC1 PE=1 SV=1
50	sp|P31327|CPSM_HUMAN	23	165975	10 (2)	0.04	Carbamoyl-phosphate synthase [ammonia], mitochondrial OS=Homo sapiens GN=CPS1 PE=1 SV=2
51	sp|P17987|TCPA_HUMAN	23	60819	3 (1)	0.05	T-complex protein 1 subunit alpha OS=Homo sapiens GN=TCP1 PE=1 SV=1
52	tr|H0Y322|H0Y322_HUMAN	19	70275	1 (1)	0.05	Protein lin-9 homolog (Fragment) OS=Homo sapiens GN=LIN9 PE=1 SV=1
53	tr|H0YC04|H0YC04_HUMAN	18	21215	2 (1)	0.16	V-type proton ATPase subunit B, brain isoform (Fragment) OS=Homo sapiens GN=ATP6V1B2 PE=1 SV=1
54	tr|J3KT45|J3KT45_HUMAN	16	48979	1 (1)	0.07	Forkhead box protein D1 OS=Homo sapiens GN=FOXD1 PE=3 SV=1
